# Supplementary material for: The mTOR effectors 4EBP1 and S6K2 are frequently coexpressed, and associated with a poor prognosis and endocrine resistance in breast cancer: a retrospective study including patients from the randomised Stockholm tamoxifen trials
Source: PubMed Central journal article supplement (PMC3978839; doi:10.1186/bcr3557), 2013-10-17
Supplement: bcr3557-S2.pdf [file bcr3557-S2.pdf]

**Supplementary Table 1** Overview of no of patients in the different cohorts and samples available for the different analyses. (TMA: tissue microarray).

| cohort                                 | Stockholm 2 | Stockholm 3 | Van de Vijver | Uppsala | Karolinska | total |
|----------------------------------------|-------------|-------------|---------------|---------|------------|-------|
| Total number of patients               | 679         | 1780        | 295           | 315     | 524        | 3593  |
| mRNA available (n)                     | 93          | -           | 295           | 236     | 159        | 783   |
| TMA available (n)                      | -           | 912         | -             | -       | -          | 912   |
| TMA cores available 4EBP1 (n/cyt)      |             | 739         |               |         |            | 739   |
| TMA cores available p4EBP1_S65 (n/cyt) |             | 768         |               |         |            | 768   |
