# Supplementary material for: The mTOR effectors 4EBP1 and S6K2 are frequently coexpressed, and associated with a poor prognosis and endocrine resistance in breast cancer: a retrospective study including patients from the randomised Stockholm tamoxifen trials
Source: PubMed Central journal article supplement (PMC3978839; doi:10.1186/bcr3557), 2013-10-17
Supplement: bcr3557-S3.pdf [file bcr3557-S3.pdf]

**Supplementary Table 2** Patient characteristics of the different cohorts included in the study.

|                          | <b>Stockholm 2</b> | <b>Stockholm 3</b> | <b>Van de Vijver</b> | <b>Uppsala</b> | <b>Karolinska</b> |
|--------------------------|--------------------|--------------------|----------------------|----------------|-------------------|
|                          | <b>n (%)</b>       |                    |                      |                |                   |
| <b>Tumour size</b>       |                    |                    |                      |                |                   |
| < 20 mm                  | 37 (43.0)          | 580 (77.2)         | 155 (53.0)           | 127 (25.4)     | 89 (62.2)         |
| >20 mm                   | 49 (57.0)          | 171 (22.8)         | 140 (47.0)           | 124 (24.8)     | 54 (37.8)         |
|                          |                    |                    |                      |                |                   |
| <b>Lymph node status</b> |                    |                    |                      |                |                   |
| -                        | 6 (7.0)            | 768 (100)          | 151 (51.2)           | 158 (65.3)     | 87 (60.8)         |
| +                        | 80 (93.0)          | 0 (0)              | 144 (48.8)           | 84 (34.7)      | 56 (39.2)         |
|                          |                    |                    |                      |                |                   |
| <b>Grade</b>             | N/A                |                    |                      |                |                   |
| <b>1</b>                 |                    | 122 (18.6)         | 75 (25.4)            | 67 (26.9)      | 27 (18.9)         |
| <b>2</b>                 |                    | 382 (58.2)         | 101 (34.2)           | 128 (51.4)     | 57 (39.9)         |
| <b>3</b>                 |                    | 152 (23.2)         | 119 (40.3)           | 54 (21.7)      | 59 (41.3)         |
|                          |                    |                    |                      |                |                   |
| <b>ER</b>                |                    |                    |                      |                |                   |
| -                        | 18 (20.9)          | 159 (21.3)         | 69 (23.4)            | 34 (13.8)      | 25 (17.5)         |
| +                        | 68 (79.1)          | 589 (78.7)         | 226 (76.6)           | 213 (88.7)     | 118 (82.5)        |
|                          |                    |                    |                      |                |                   |
| <b>PgR</b>               | N/A                |                    | N/A                  |                | N/A               |
| -                        |                    | 327 (47.6)         |                      | 61 (24.3)      |                   |
| +                        |                    | 360 (52.4)         |                      | 190 (75.7)     |                   |
|                          |                    |                    |                      |                |                   |
| <b>HER2</b>              |                    |                    | N/A                  | N/A            | N/A               |
| -                        | 71 (77.2)          | 634 (88.7)         |                      |                |                   |
| +                        | 21 (22.8)          | 81 (11.3)          |                      |                |                   |
