# Supplementary material for: The mTOR effectors 4EBP1 and S6K2 are frequently coexpressed, and associated with a poor prognosis and endocrine resistance in breast cancer: a retrospective study including patients from the randomised Stockholm tamoxifen trials
Source: PubMed Central journal article supplement (PMC3978839; doi:10.1186/bcr3557), 2013-10-17
Supplement: bcr3557-S4.pdf [file bcr3557-S4.pdf]

**Supplementary Table 3** Distribution of 4EBP1 and p4EBP1\_S65 protein expression among samples in the Stockholm 3 cohort.

| <b>4EBP1 cytoplasmic expression</b> |     |      | <b>4EBP1 nuclear expression</b> |     |      |
|-------------------------------------|-----|------|---------------------------------|-----|------|
|                                     | n   | %    |                                 | n   | %    |
| negative/weak                       | 177 | 24.0 | negative/weak                   | 69  | 9.0  |
| intermediate                        | 299 | 40.0 | intermediate                    | 411 | 56.0 |
| strong                              | 263 | 36.0 | strong                          | 259 | 35.0 |
| $\Sigma$                            | 739 | 100% | $\Sigma$                        | 739 | 100% |

| <b>p4EBP1_S65 cytoplasmic expression</b> |     |      | <b>p4EBP1_S65 nuclear expression</b> |     |      |
|------------------------------------------|-----|------|--------------------------------------|-----|------|
|                                          | n   | %    |                                      | n   | %    |
| negative/weak                            | 203 | 26.4 | negative/weak                        | 38  | 4.9  |
| intermediate                             | 339 | 44.1 | intermediate                         | 274 | 35.7 |
| strong                                   | 226 | 29.4 | strong                               | 456 | 59.4 |
| $\Sigma$                                 | 768 | 100% | $\Sigma$                             | 768 | 100% |
