# Supplementary material for: The mTOR effectors 4EBP1 and S6K2 are frequently coexpressed, and associated with a poor prognosis and endocrine resistance in breast cancer: a retrospective study including patients from the randomised Stockholm tamoxifen trials
Source: PubMed Central journal article supplement (PMC3978839; doi:10.1186/bcr3557), 2013-10-17
Supplement: bcr3557-S5.pdf [file bcr3557-S5.pdf]

**Supplementary Table 4** 4EBP1, S6K1 and S6K2 mRNA in the Stockholm 2 cohort: correlations to gene copy number, clinicopathological factors, and the PI3K/AKT/mTOR pathway. Tam: tamoxifen, RT: radiotherapy, CMF: cyclophosphamide metotrexate, 5-fluorouracil chemotherapy

|                           | S6K1                |           |           |           |                          | S6K2                |           |           |           |                          | 4EBP1               |           |           |           |                  |
|---------------------------|---------------------|-----------|-----------|-----------|--------------------------|---------------------|-----------|-----------|-----------|--------------------------|---------------------|-----------|-----------|-----------|------------------|
|                           | mRNA quartile n (%) |           |           |           | Spearman R               | mRNA quartile n (%) |           |           |           | Spearman R               | mRNA quartile n (%) |           |           |           | Spearman R       |
| Gene copy number          | 0                   | 1         | 2         | 3         |                          | 0                   | 1         | 2         | 3         |                          | 0                   | 1         | 2         | 3         |                  |
| 0-2                       | 18 (29.0)           | 14 (22.6) | 15 (24.2) | 15 (24.2) |                          | 17 (28.8)           | 19 (32.2) | 12 (20.3) | 11 (18.6) |                          | N/A                 |           |           |           |                  |
| 3                         | 0 (0)               | 0(0)      | 3 (50)    | 3 (50)    |                          | 1 (10.0)            | 1 (10.0)  | 4 (40.0)  | 4 (40.0)  |                          |                     |           |           |           |                  |
| ≥ 4                       | 0 (0)               | 2 (22.2)  | 3 (33.3)  | 4 (44.4)  | <b>R=0.30, p=0.0074</b>  | 0 (0)               | 0 (0)     | 1 (14.3)  | 6 (85.7)  | <b>R=0.43, p=0.00010</b> |                     |           |           |           |                  |
| <b>Tam treatment</b>      |                     |           |           |           |                          |                     |           |           |           |                          |                     |           |           |           |                  |
| no Tam                    | 9 (23.1)            | 12 (30.8) | 9 (23.1)  | 9 (23.1)  |                          | 11 (28.2)           | 9 (23.1)  | 8 (20.5)  | 11 (28.2) |                          | 12 (30.8)           | 9 (23.1)  | 10 (25.6) | 8 (20.5)  |                  |
| Tam                       | 15 (27.8)           | 11 (20.4) | 14 (25.9) | 14 (25.9) | R=0.016, p=0.88          | 13 (24.1)           | 14 (25.9) | 14 (25.9) | 13 (24.1) | R=0.0059, p=0.96         | 12 (22.2)           | 14 (25.9) | 12 (22.2) | 16 (29.6) | R=0.10, p=0.33   |
| <b>CMF/RT</b>             |                     |           |           |           |                          |                     |           |           |           |                          |                     |           |           |           |                  |
| RT                        | 9 (20.5)            | 10 (22.7) | 10 (22.7) | 15 (34.1) |                          | 9 (20.5)            | 12 (27.3) | 10 (22.7) | 13 (29.6) |                          | 13 (29.6)           | 8 (18.2)  | 8 (18.2)  | 15 (34.1) |                  |
| CMF                       | 15 (30.6)           | 13 (26.5) | 13 (26.5) | 8 (16.3)  | R=-0.19, p=0.074         | 15 (30.6)           | 11 (22.5) | 12 (24.5) | 11 (22.5) | R=-0.10, p=0.34          | 11 (22.5)           | 15 (30.6) | 14 (28.6) | 9 (18.4)  | R=-0.06, p=0.56  |
| <b>Tumour size</b>        |                     |           |           |           |                          |                     |           |           |           |                          |                     |           |           |           |                  |
| ≤ 20 mm                   | 10 (25.6)           | 11 (28.2) | 10 (25.6) | 8 (20.5)  |                          | 7 (18.0)            | 11 (28.2) | 10 (25.6) | 11 (28.2) |                          | 10 (25.6)           | 4 (10.3)  | 12 (30.8) | 13 (33.3) |                  |
| < 20 mm                   | 14 (25.9)           | 12 (22.2) | 13 (24.1) | 15 (27.8) | R=0.06, p=0.60           | 17 (31.5)           | 12 (22.2) | 12 (22.2) | 13 (24.1) | R=-0.11, p=0.29          | 14 (25.9)           | 19 (35.2) | 10 (18.5) | 11 (20.4) | R= -0.17, p=0.11 |
| <b>Nodes</b>              |                     |           |           |           |                          |                     |           |           |           |                          |                     |           |           |           |                  |
| -                         | 2 (25.0)            | 0 (0)     | 1 (12.5)  | 5 (62.5)  |                          | 1 (12.5)            | 2 (25.0)  | 1 (12.5)  | 4 (50.0)  |                          | 1 (12.50)           | 3 (37.5)  | 2 (25.0)  | 2 (25.0)  |                  |
| +                         | 22 (25.9)           | 23 (27.1) | 22 (25.9) | 18 (21.2) | R=-0.17, p=0.095         | 23 (27.1)           | 21 (24.7) | 21 (24.7) | 20 (23.5) | R=-0.14, p=0.19          | 23 (27.1)           | 20 (23.5) | 20 (23.5) | 22 (25.9) | R=-0.036, p=0.73 |
| <b>S-phase fraction</b>   |                     |           |           |           |                          |                     |           |           |           |                          |                     |           |           |           |                  |
| < 10%                     | 7 (15.2)            | 10 (21.7) | 14 (30.4) | 15 (32.6) |                          | 12 (26.1)           | 13 (28.3) | 11 (23.9) | 10 (21.7) |                          | 11 (23.9)           | 13 (28.3) | 11 (23.9) | 11 (23.9) |                  |
| ≥ 10%                     | 14 (35.0)           | 12 (30.0) | 8 (20.0)  | 6 (15.0)  | <b>R=-0.29, p=0.0059</b> | 10 (25.0)           | 9 (22.5)  | 10 (25.0) | 11 (27.5) | R=0.06, P=0.58           | 10 (25.0)           | 10 (25.0) | 9 (22.5)  | 11 (27.5) | R=0.020, P=0.85  |
| <b>ER</b>                 |                     |           |           |           |                          |                     |           |           |           |                          |                     |           |           |           |                  |
| -                         | 13 (61.9)           | 3 (14.3)  | 4 (19.1)  | 1 (4.8)   |                          | 5 (23.8)            | 8 (38.1)  | 5 (23.8)  | 3 (14.3)  |                          | 5 (23.8)            | 7 (33.3)  | 2 (9.5)   | 7 (33.3)  |                  |
| +                         | 11 (15.3)           | 20 (27.8) | 19 (26.4) | 22 (30.6) | <b>R=0.39, p=0.00009</b> | 19 (26.4)           | 15 (20.8) | 17 (23.6) | 21 (29.2) | R=0.098, P=0.35          | 19 (26.4)           | 16 (22.2) | 20 (27.8) | 17 (23.6) | R=-0.015, p=0.89 |
| <b>HER2 amplification</b> |                     |           |           |           |                          |                     |           |           |           |                          |                     |           |           |           |                  |
| -                         | 16 (22.5)           | 15 (21.1) | 18 (25.4) | 22 (31.0) |                          | 19 (26.8)           | 16 (22.5) | 16 (22.5) | 20 (28.2) |                          | 17 (23.9)           | 16 (22.5) | 19 (26.8) | 19 (26.8) |                  |
| +                         | 5 (29.4)            | 6 (35.3)  | 5 (29.4)  | 1 (5.9)   | R=-0.19, p=0.076         | 4 (23.5)            | 6 (35.3)  | 4 (23.5)  | 3 (17.7)  | R=-0.057, p=0.60         | 6 (35.3)            | 5 (29.4)  | 2 (11.8)  | 4 (23.5)  | R=-0.11, p=0.29  |
| <b>HER2 protein</b>       |                     |           |           |           |                          |                     |           |           |           |                          |                     |           |           |           |                  |
| -                         | 15 (21.1)           | 14 (19.7) | 20 (28.2) | 22 (31.0) |                          | 18 (25.4)           | 17 (23.9) | 17 (23.9) | 19 (26.8) |                          | 19 (26.8)           | 18 (25.4) | 17 (23.9) | 17 (23.9) |                  |
| +                         | 8 (38.1)            | 9 (42.9)  | 3 (14.3)  | 1 (4.8)   | <b>R=-0.31, p=0.0024</b> | 6 (28.6)            | 5 (23.8)  | 5 (23.8)  | 5 (23.8)  | R=-0.034, p=0.75         | 5 (23.8)            | 5 (23.8)  | 5 (23.8)  | 6 (28.6)  | R=0.045, p=0.67  |
| <b>PIK3CA mut</b>         |                     |           |           |           |                          |                     |           |           |           |                          |                     |           |           |           |                  |
| -                         | 21 (29.2)           | 16 (22.2) | 18 (25.0) | 17 (23.6) |                          | 17 (23.6)           | 15 (20.8) | 20 (27.8) | 20 (27.8) |                          | 16 (22.2)           | 20 (27.8) | 17 (23.6) | 19 (26.4) |                  |
| +                         | 2 (10.5)            | 7 (36.8)  | 4 (21.1)  | 6 (31.6)  | R=0.11, p=0.29           | 7 (36.8)            | 7 (36.8)  | 1 (5.3)   | 4 (21.1)  | R=-0.17, p=0.10          | 8 (42.1)            | 2 (10.5)  | 4 (21.1)  | 5 (26.3)  | R=-0.082, p=0.44 |
| <b>pAKT_S473</b>          |                     |           |           |           |                          |                     |           |           |           |                          |                     |           |           |           |                  |
| 0%                        | 9 (22.0)            | 14 (34.1) | 9 (22.0)  | 9 (22.0)  |                          | 13 (31.7)           | 4 (9.8)   | 11 (26.8) | 13 (31.7) |                          | 13 (31.7)           | 9 (22.0)  | 8 (19.5)  | 11 (26.8) |                  |
| 1-10%                     | 5 (25.0)            | 4 (20.0)  | 7 (35.0)  | 4 (20.0)  |                          | 8 (40.0)            | 5 (25.0)  | 3 (15.0)  | 4 (20.0)  |                          | 4 (20.0)            | 8 (40.0)  | 5 (25.0)  | 3 (15.0)  |                  |
| > 10%                     | 10 (31.3)           | 5 (15.6)  | 7 (21.9)  | 10 (31.3) | R=0.036, p=0.73          | 3 (9.4)             | 14 (43.8) | 8 (25.0)  | 7 (21.9)  | R=-0.0090, p=0.93        | 7 (21.9)            | 6 (18.8)  | 9 (28.1)  | 10 (31.3) | R=0.099, p=0.34  |
