# Supplementary material for: The mTOR effectors 4EBP1 and S6K2 are frequently coexpressed, and associated with a poor prognosis and endocrine resistance in breast cancer: a retrospective study including patients from the randomised Stockholm tamoxifen trials
Source: PubMed Central journal article supplement (PMC3978839; doi:10.1186/bcr3557), 2013-10-17
Supplement: bcr3557-S6.pdf [file bcr3557-S6.pdf]

**Supplementary Table 5** 4EBP1 and p4EBP1\_S65 protein in the Stockholm 3 cohort: correlations to clinicopathological factors and the AKT/mTOR pathway.

| <b>4EBP1 cytoplasm</b>       | <b>Spearman R</b> | <b>p-value</b> | <b>4EBP1 nucleus</b>         | <b>Spearman R</b> | <b>p-value</b> |
|------------------------------|-------------------|----------------|------------------------------|-------------------|----------------|
| <i>Tamoxifen treatment</i>   | -0.01             | 0.82           | <i>Tamoxifen treatment</i>   | 0.00              | 0.98           |
| <i>Tumour size &gt; 20mm</i> | 0.11              | 0.0037         | <i>Tumour size &gt; 20mm</i> | 0.04              | 0.29           |
| <i>Nottingham grade</i>      | 0.22              | <0.0000001     | <i>Nottingham grade</i>      | 0.07              | 0.09           |
| <i>ER</i>                    | -0.13             | 0.0006         | <i>ER</i>                    | -0.03             | 0.48           |
| <i>PgR</i>                   | -0.07             | 0.082          | <i>PgR</i>                   | 0.01              | 0.75           |
| <i>HER2</i>                  | 0.13              | 0.00096        | <i>HER2</i>                  | 0.04              | 0.33           |
| <i>pAKTcyt</i>               | 0.20              | <0.0000001     | <i>pAKTn</i>                 | 0.01              | 0.74           |
| <i>pmTORcyt</i>              | 0.02              | 0.61           | <i>pmTORn</i>                | N/A               |                |
| <i>S6K2cyt</i>               | 0.20              | <0.0000001     | <i>S6K2n</i>                 | 0.05              | 0.21           |
| <i>p4EBP1_S65 cyt</i>        | 0.39              | <0.0000001     | <i>p4EBP1_s65 n</i>          | 0.14              | 0.00028        |

  

| <b>p4EBP1_S65 cytoplasm</b>  | <b>Spearman R</b> | <b>p-value</b> | <b>p4EBP1_S65 nucleus</b>    | <b>Spearman R</b> | <b>p-value</b> |
|------------------------------|-------------------|----------------|------------------------------|-------------------|----------------|
| <i>Tamoxifen treatment</i>   | -0.04             | 0.29           | <i>Tamoxifen treatment</i>   | -0.05             | 0.15           |
| <i>Tumour size &gt; 20mm</i> | 0.09              | 0.015          | <i>Tumour size &gt; 20mm</i> | -0.11             | 0.0033         |
| <i>Nottingham grade</i>      | 0.34              | <0.0000001     | <i>Nottingham grade</i>      | -0.08             | 0.044          |
| <i>ER</i>                    | -0.16             | 0.0000009      | <i>ER</i>                    | 0.03              | 0.4            |
| <i>PgR</i>                   | -0.08             | 0.027          | <i>PgR</i>                   | 0.04              | 0.33           |
| <i>HER2</i>                  | 0.11              | 0.0046         | <i>HER2</i>                  | -0.09             | 0.022          |
| <i>pAKTcyt</i>               | 0.34              | <0.0000001     | <i>pAKTn</i>                 | 0.22              | <0.0000001     |
| <i>pmTORcyt</i>              | 0.00              | 0.92           | <i>pmTORn</i>                | N/A               |                |
| <i>S6K2cyt</i>               | 0.14              | 0.0001         | <i>S6K2n</i>                 | 0.17              | 0.000002       |
| <i>4EBP1cyt</i>              | 0.39              | <0.0000001     | <i>4EBP1n</i>                | 0.14              | 0.00028        |
